# Supplementary figures and images for: Down-Regulation of the Longevity-Associated Protein SIRT1 in Peripheral Blood Mononuclear Cells of Treated HIV Patients
Source: MDPI journal article supplement (doi:10.3390/cells11030348), 2022-01-20

Supplementary Figure S1

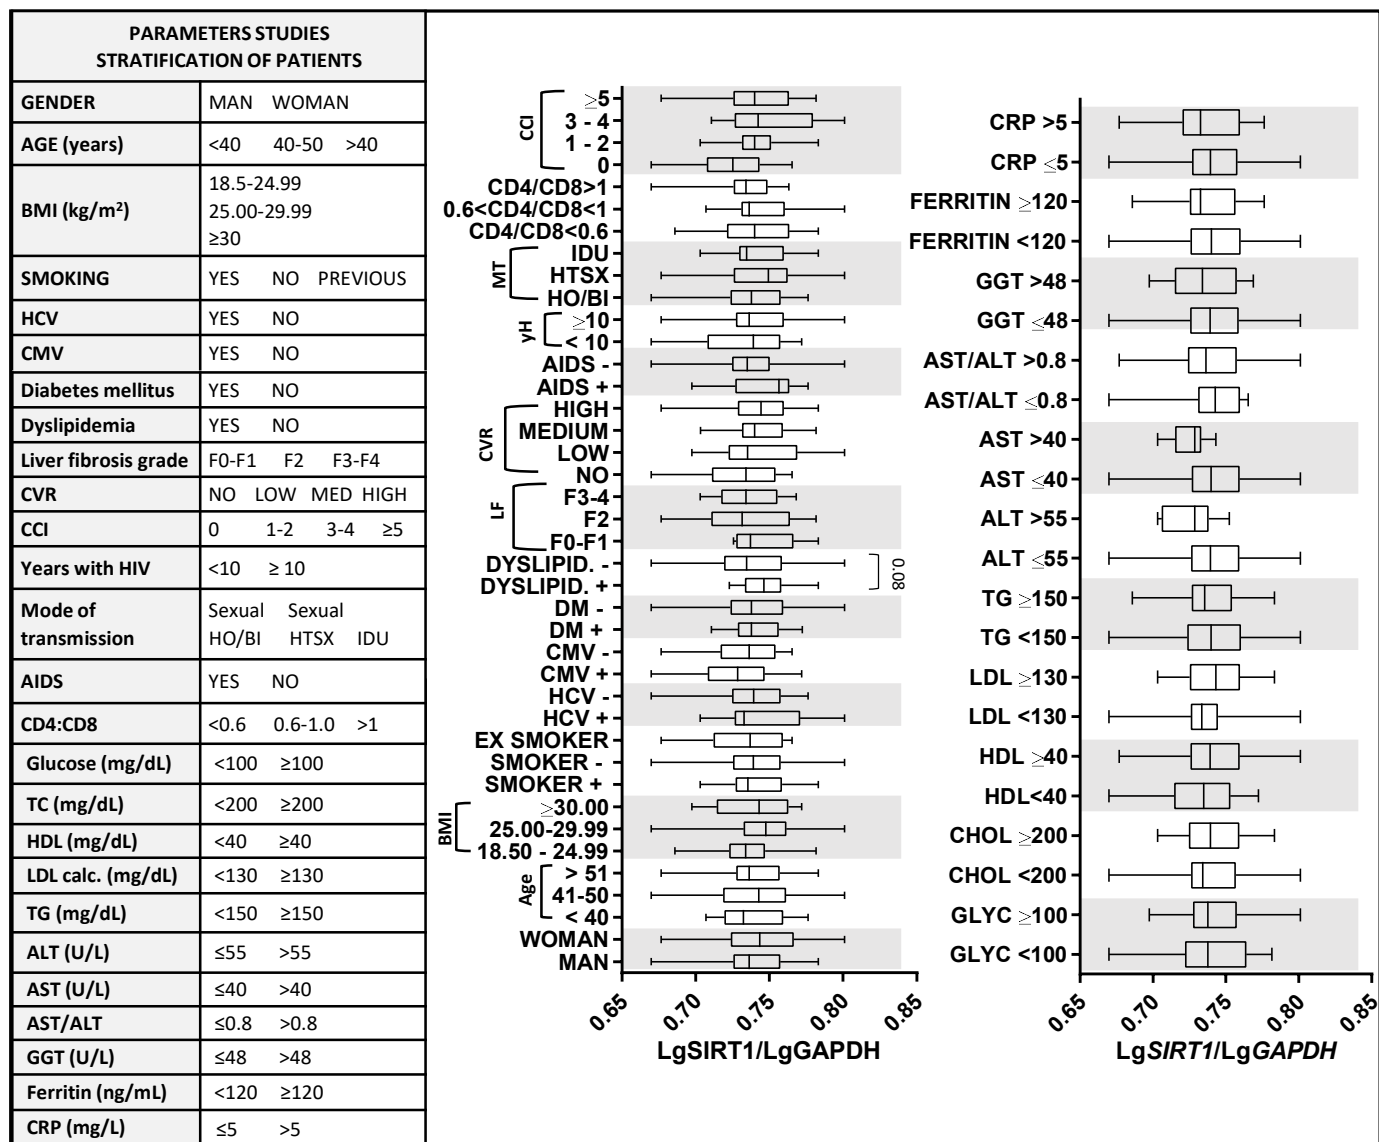

Supplement: s1 [file s1]
